# Supplementary material
Source: publisher figshare collection journal article supplement (https://gsajournals.figshare.com/articles/dataset/_/14357234)
Supplement: Supplementary file 1 [file 1]

### ***Estimation of the probabilities of recurrent mutations in the same gene.***

Let us consider a random  $28 \times 6075$  matrix (the rows of the matrix represent independent sequenced genomes, the columns represent the number of functional yeast genes used in this study). If there is a mutation in the gene  $j$  from the genome  $i$ ,  $a_{ij} = 1$ , otherwise  $a_{ij} = 0$ . Thus, the entries  $a_{ij}$  are independent variables taking the value 1 with the probability  $p$  and the value 0 with the probability  $1-p$ . Note that the probability is the same for all  $i$  and  $j$ . Our goal is to estimate the probability  $P_{\geq 5}$  that there is a gene where at least 5 independent mutations were found (the total number of mutations found in 28 independent genomes is 197, **Suppl. Table 6**). Let us first estimate  $p$ . Since the variables are independent, the expected value of the total number of mutations is

$$E\left(\sum_{i=1}^{28} \sum_{j=1}^{6075} a_{ij}\right) = \left(\sum_{i=1}^{28} \sum_{j=1}^{6075} E(a_{ij})\right) = 28 \times 6075 \times p = 197$$

whence

$$p = \frac{197}{28 \times 6075} = 1.16 \times 10^{-3}$$

Now let us calculate the probability of at least 5 mutations in a fixed gene  $j$ . The probability of exactly  $k$  mutations in this gene is

$$\binom{28}{k} p^k (1-p)^{28-k}.$$

Thus, the probability of at most 4 mutations is

$$p_{\leq 4} = \sum_{k=0}^4 \binom{28}{k} p^k (1-p)^{28-k}$$

and the probability of at least 5 mutations is

$$p_{\geq 5} = 1 - p_{\leq 4} \approx 2 \times 10^{-10}.$$

Finally, since the events “at least five mutations in the  $j$ -th gene” are independent for different  $j$ , the probability  $P_{\geq 5}$  is

$$P_{\geq 5} = 1 - (1 - p_{\geq 5})^{6075} = 1.2 \times 10^{-6}.$$

The same logic was applied to 3 and 4 multiple independent mutations.

3 mutations,  $P = 0.0302$

4 mutations,  $P = 0.0002$

5 mutations,  $P = 1.2 \times 10^{-6}$

Thus, the probability of observing 3 independent mutations in the same gene is marginally significant, whereas 4 mutations are highly significant.

We also performed a simulation experiment as a control; we randomly populated the  $28 \times 6075$  matrix with 197 mutations and estimated a weight

$$W_{\text{random}} = \underset{j=1}{\overset{6075}{\text{MAX}}} \left( \sum_{i=1}^{28} a_{ij} \right)$$

We repeated this procedure 1000 times and did not find any simulated matrix with the weight  $W_{\text{random}} \geq 5$ . The result suggested that the probability of observing 5 or more mutations in a gene is less than 0.001. This is consistent with our analytical estimates ( $P_{\geq 5} \approx 1.2 \times 10^{-6}$ ).

Thus, the probability of finding 5 or more mutations in a gene is extremely small, suggesting that this event is likely to be biologically important.
