# Supplementary material
Source: publisher figshare collection journal article supplement (https://gsajournals.figshare.com/articles/dataset/_/14357234)
Supplement: Supplementary file 2 [file 1]

A.

wild-type

*pol2rc-ΔN*

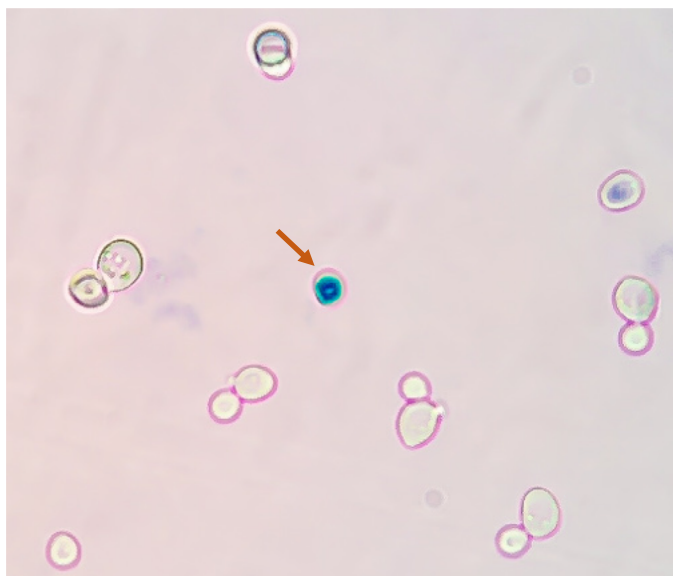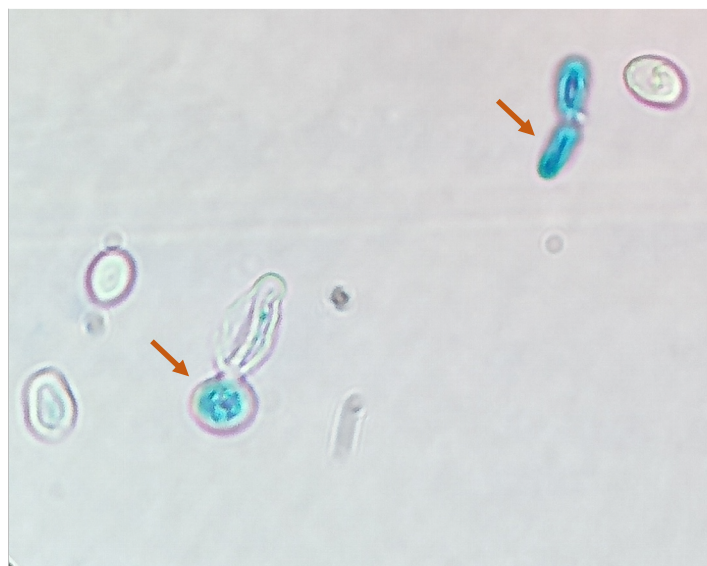

B.

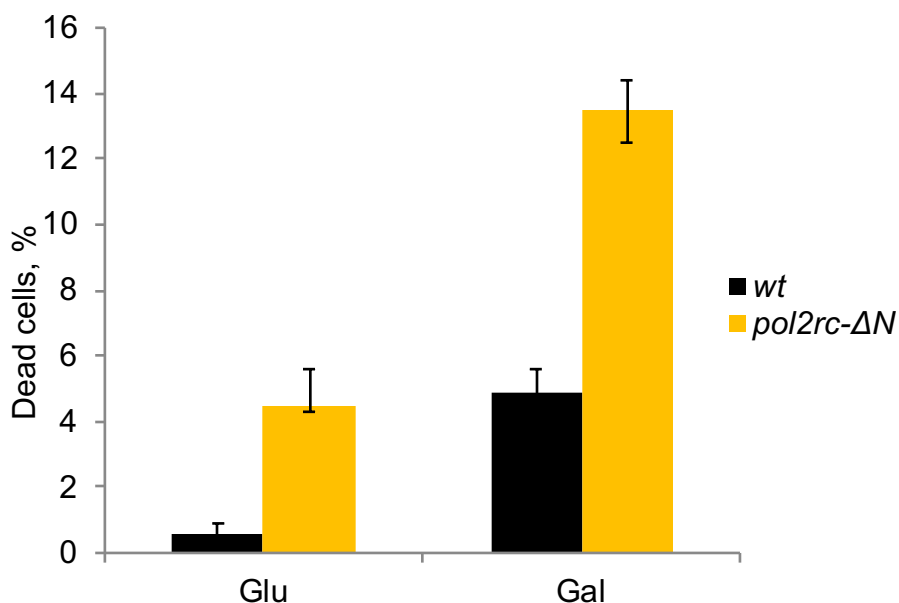

**Supplemental Figure 7. Higher proportion of dead methylene blue-stained cells in cultures of *pol2rc-ΔN* strains in comparison to wild-type strains.**

**A.** Example of the appearance of cells stained with methylene blue under microscope, marked by brown arrows. **B.** The proportion of the dead cells in wild-type (black) and *pol2rc-ΔN* cells (yellow) Glu – YPD\*, Gal – YPRG\*. For each variant, 5000 cells were evaluated. Error bars represent 95% confidence interval calculated by the Score method. Association between wild-type or *pol2rc-ΔN* and cell's phenotype on glucose or galactose media separately is statistically significant, estimated by Pearson's chi-squared statistic in a contingency table (chi=134.9, p=3.4841E-31 and chi=197.2, p=8.5279E-45, for glucose or galactose media respectively).
