# Supplementary material
Source: publisher figshare collection journal article supplement (https://gsajournals.figshare.com/articles/dataset/_/14357234)
Supplement: Supplementary file 3 [file 1]

**Supplemental Table 3. The *pol2rc-ΔN* elevates chromosome instability\*.**

| Strain           | Median frequency of illegitimate mating x10 <sup>-7</sup> (95% confidence interval) |                                                    |                            |                                   |                                       |                                                   |
|------------------|-------------------------------------------------------------------------------------|----------------------------------------------------|----------------------------|-----------------------------------|---------------------------------------|---------------------------------------------------|
|                  | Illegitimate hybridization                                                          | Point mutations and primary lesions in <i>MATα</i> | Chromosome <i>III</i> loss | Loss of Chr. <i>III</i> right arm | Conversion <i>HMRa</i> -> <i>MATα</i> | Recombination between <i>HMRa</i> and <i>MATα</i> |
| wild-type        | <b>35.6</b><br>(20.3-42.8)                                                          | <b>29.6</b><br>(16.8-35.5)                         | <b>2.2</b><br>(1.3-2.7)    | <b>2.5</b><br>(1.4-3.1)           | <b>0.2</b><br>(0.1 - 0.22)            | <b>0.15</b><br>(0.09 - 0.19)                      |
| <i>pol2rc-ΔN</i> | <b>256.6</b><br>(132.7 - 350.5)                                                     | <b>126.3</b><br>(65.3 - 172.5)                     | <b>47.6</b><br>(24.6-65.0) | <b>73.7</b><br>(38.1 - 100.6)     | <b>0.7</b><br>(0.4 - 0.9)             | <b>0.3</b><br>(0.1 - 0.4)                         |

\* - measured by the α-test, also known as illegitimate mating test.
