# Supplementary material
Source: publisher figshare collection journal article supplement (https://gsajournals.figshare.com/articles/dataset/_/14357234)
Supplement: Supplementary file 4 [file 1]

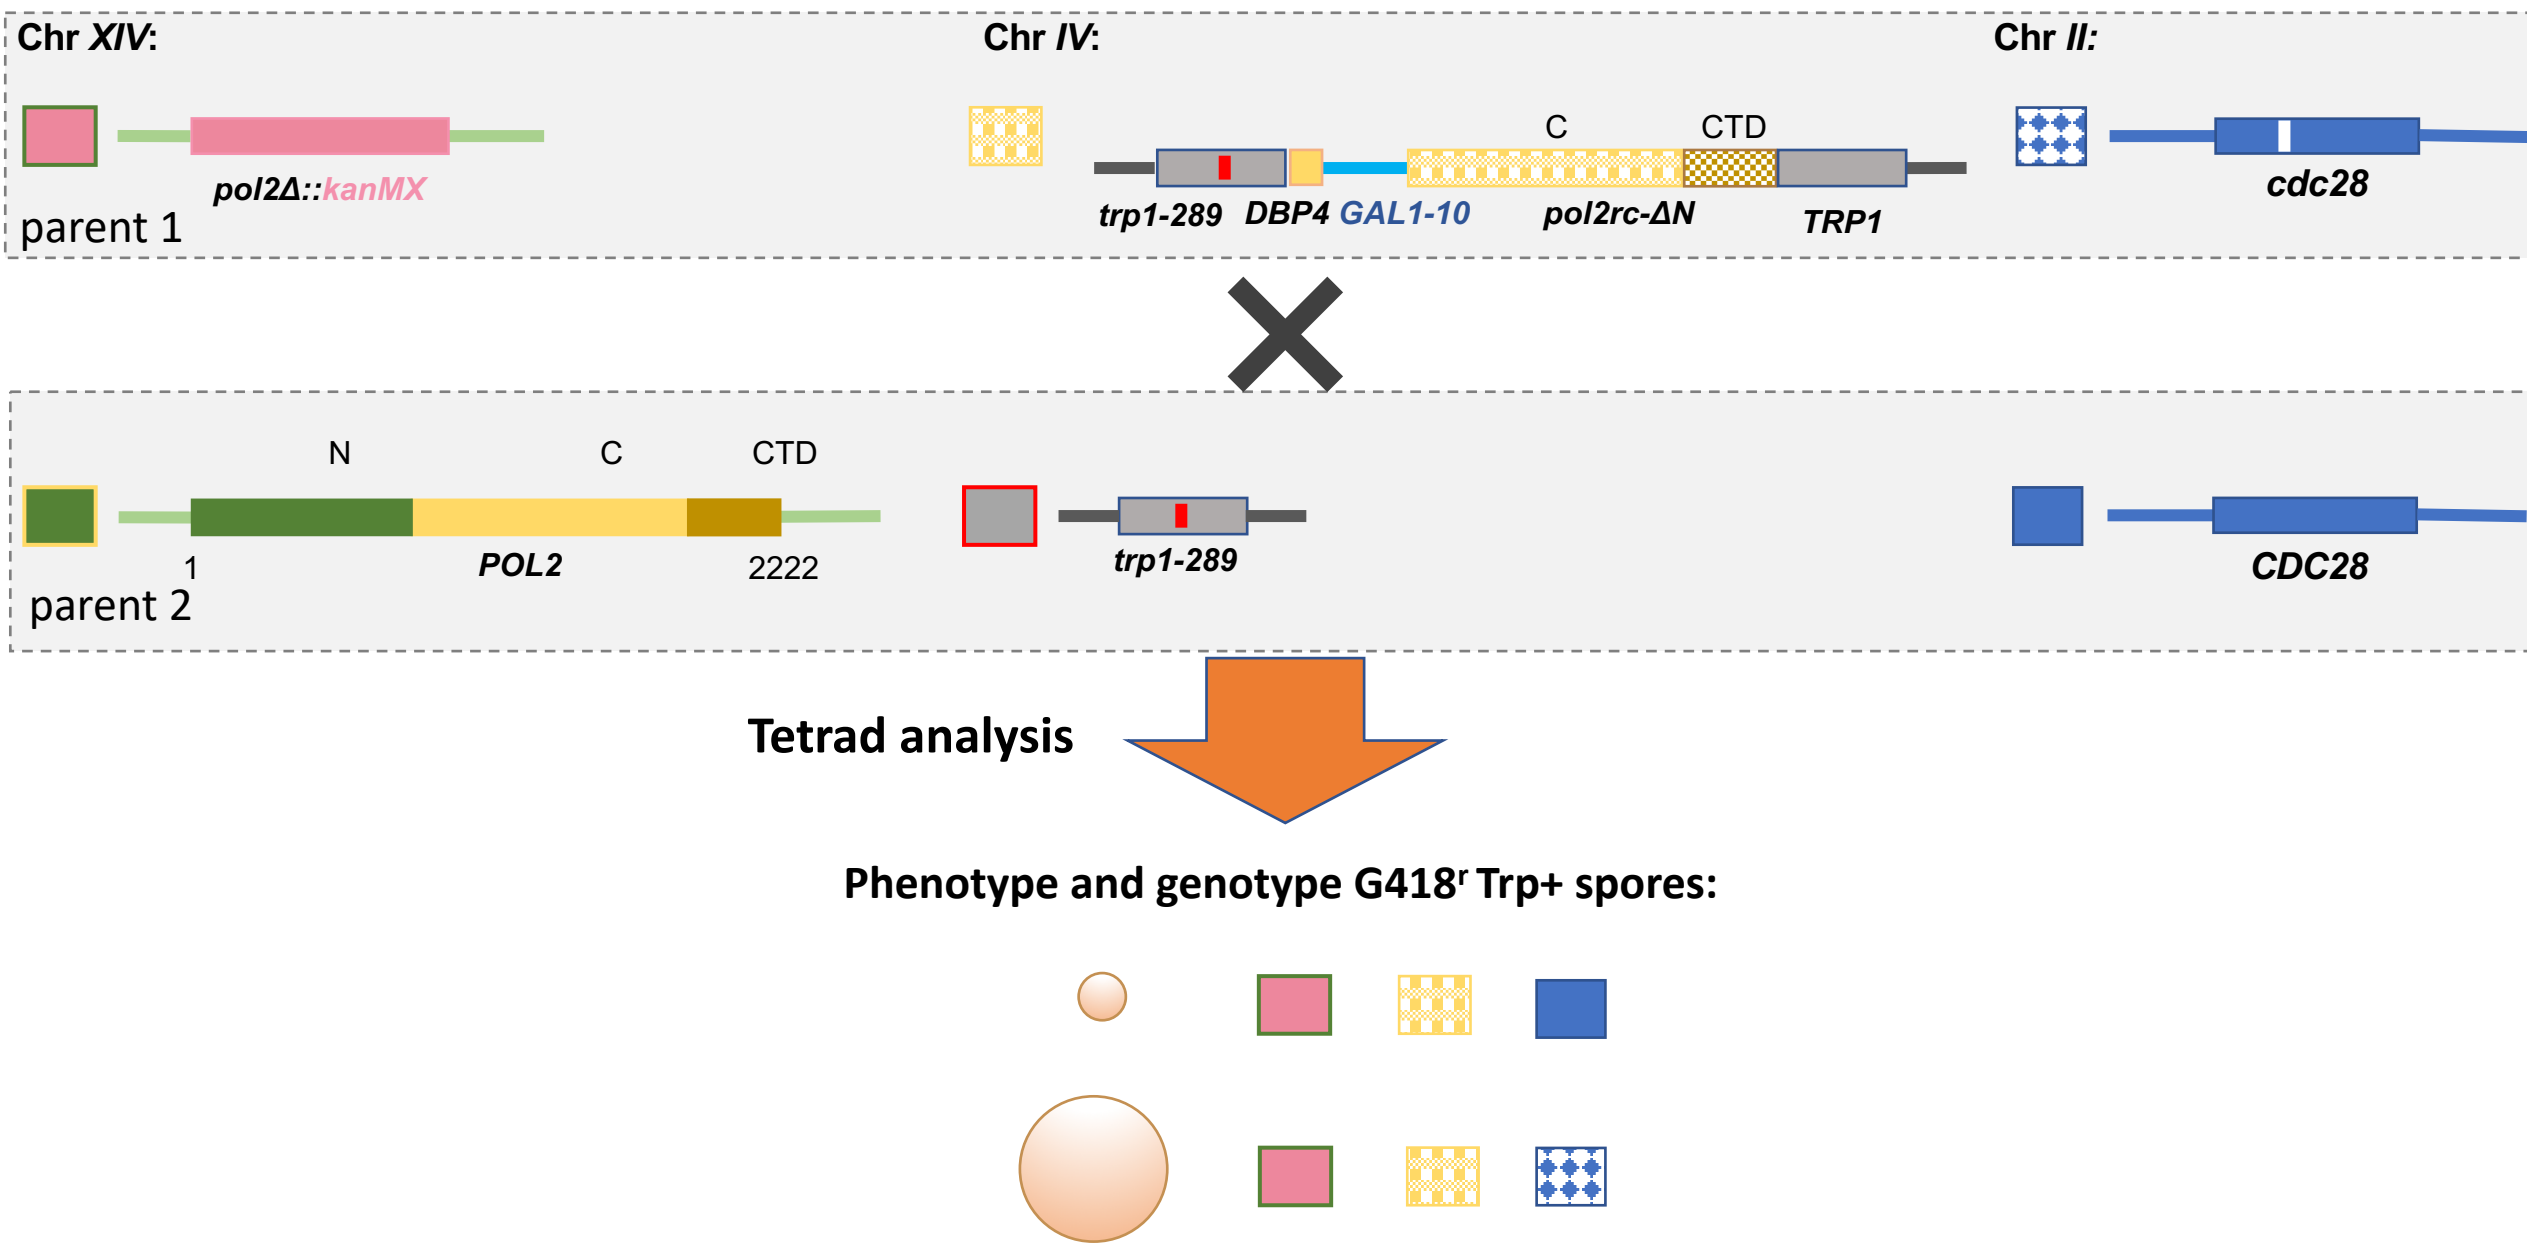

**Supplemental Figure 9. Schematic of analysis to find if single *cdc28* mutations can confer a growth advantage to *pol2rc-ΔN* strains.** Segregants carrying different *cdc28* mutations were crossed to the wild-type strain, and the *CDC28* gene was sequenced in *pol2-Δ pol2rc-ΔN* isolates. In addition to symbols used in Fig. 1, here we used blue for wild-type *CDC28* and patterned blue for *cdc28* mutations.
