# Supplementary material
Source: publisher figshare collection journal article supplement (https://gsajournals.figshare.com/articles/dataset/_/14357234)
Supplement: Supplementary file 5 [file 1]

Parental heterozygous diploid:

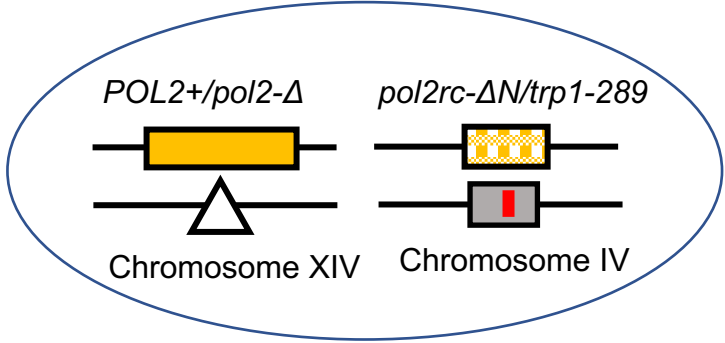

Induction of meiosis and tetrad analysis

Types of tetrads:

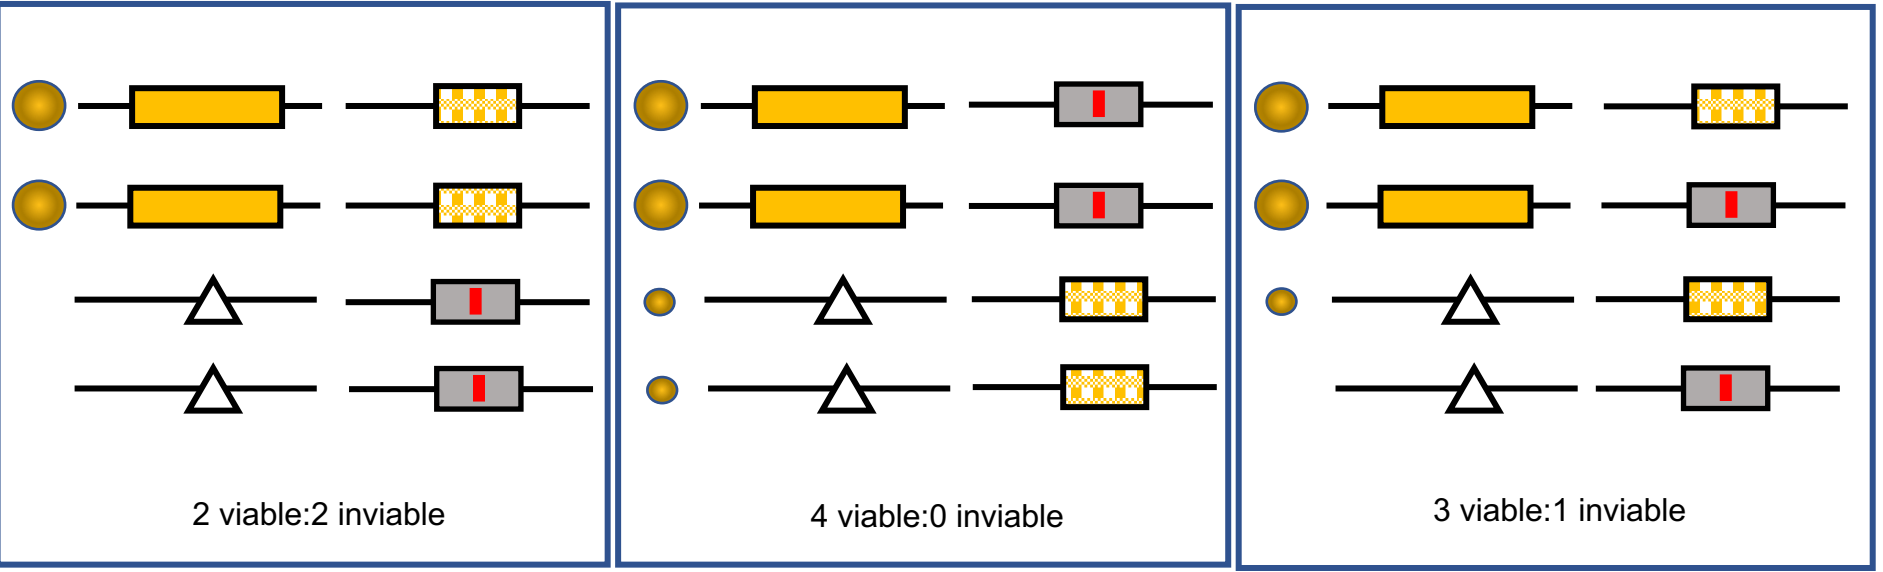

Ratio of types of tetrads:      1      :      1      :      4

**Supplemental Figure 1. Creation of haploid *pol2rc-ΔN* strains.**

Natural *POL2* gene is represented by a box colored yellow, recoded truncated gene – a shorter box with a yellow pattern. The black triangle represents a deletion of *POL2*; the *trp1-1* allele is represented by a grey box with a vertical red line. Each large box shows a cartoon of yeast colonies in tetrads to the left and their genotypes to the right. Allele *pol2rc-ΔN* is drawn as a single box (to fit into space), but it is actually flanked by *TRP1* and *trp1-289*.
