# Supplementary material
Source: publisher figshare collection journal article supplement (https://gsajournals.figshare.com/articles/dataset/_/14357234)
Supplement: Supplementary file 6 [file 1]

**Supplemental Table 1. Mutator effect of *pol2rc-ΔN* is reduced 60% in strain without the catalytic subunit of pol ζ, Rev3.**

| Parent diploid and type of segregants                           | Rate of Can <sup>r</sup> x 10 <sup>-7</sup><br>(95% confidence interval) |
|-----------------------------------------------------------------|--------------------------------------------------------------------------|
| YEE303r3hB/+:<br><i>POL2rc rev3::hph</i> segregants (n=2)*      | 1.5<br>(0.9-3.3)                                                         |
| YEE304r3hB/+:<br><i>pol2rc-ΔN rev3::hph</i> segregants<br>(n=9) | 32<br>(15-50)                                                            |
| YEE304r3hB/+:<br><i>pol2rc-ΔN REV3</i> segregants (n=9)         | 83<br>(61-148)                                                           |

\*- for each segregant, 9-18 independent cultures were used to estimate median mutation rates
