# Supplementary material
Source: publisher figshare collection journal article supplement (https://gsajournals.figshare.com/articles/dataset/_/14357234)
Supplement: Supplementary file 7 [file 1]

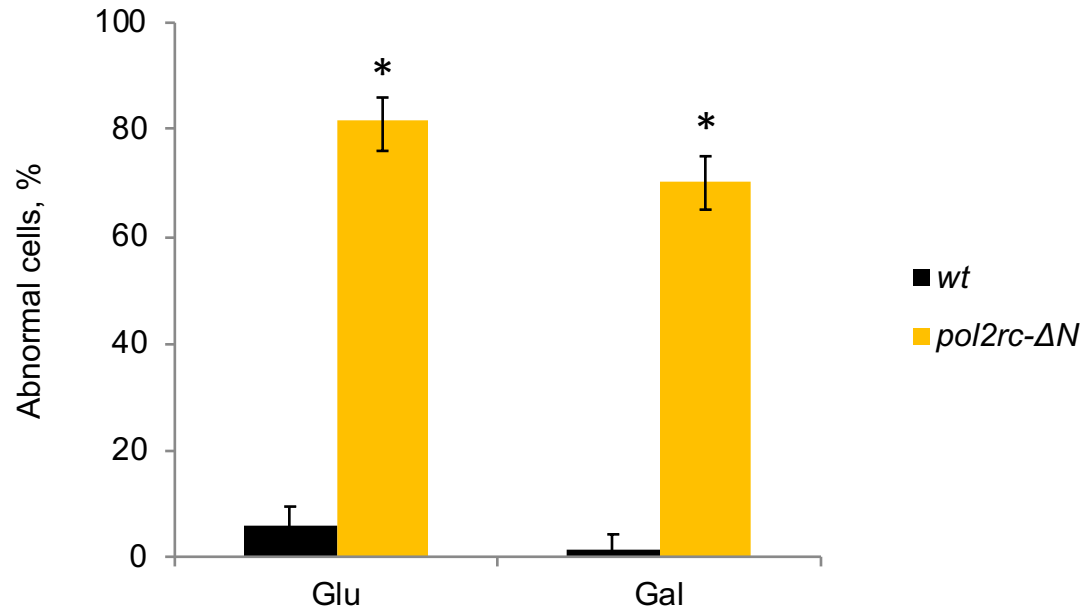

**Supplemental Figure 5. High proportion of cells with abnormal morphology and diffuse nuclear material in *pol2rc-ΔN* cells.**

Glu – YPD\*, Gal – YPRG\*. For each variant, 200 cells were evaluated. Error bars represent 95% confidence interval calculated by the Score method.

\* - the association between wild-type or *pol2rc-ΔN* and cell's morphology and nuclear status on glucose or galactose media is statistically significant, estimated by Pearson's  $\chi^2$  statistic in a contingency table ( $\chi^2 = 294.4$ ,  $p = 5.5523\text{E-}66$  and  $\chi^2 = 230.9$ ,  $p = 3.7889\text{E-}52$ , respectively for glucose or galactose media).
