# Supplementary material
Source: publisher figshare collection journal article supplement (https://gsajournals.figshare.com/articles/dataset/_/14357234)
Supplement: Supplementary file 8 [file 1]

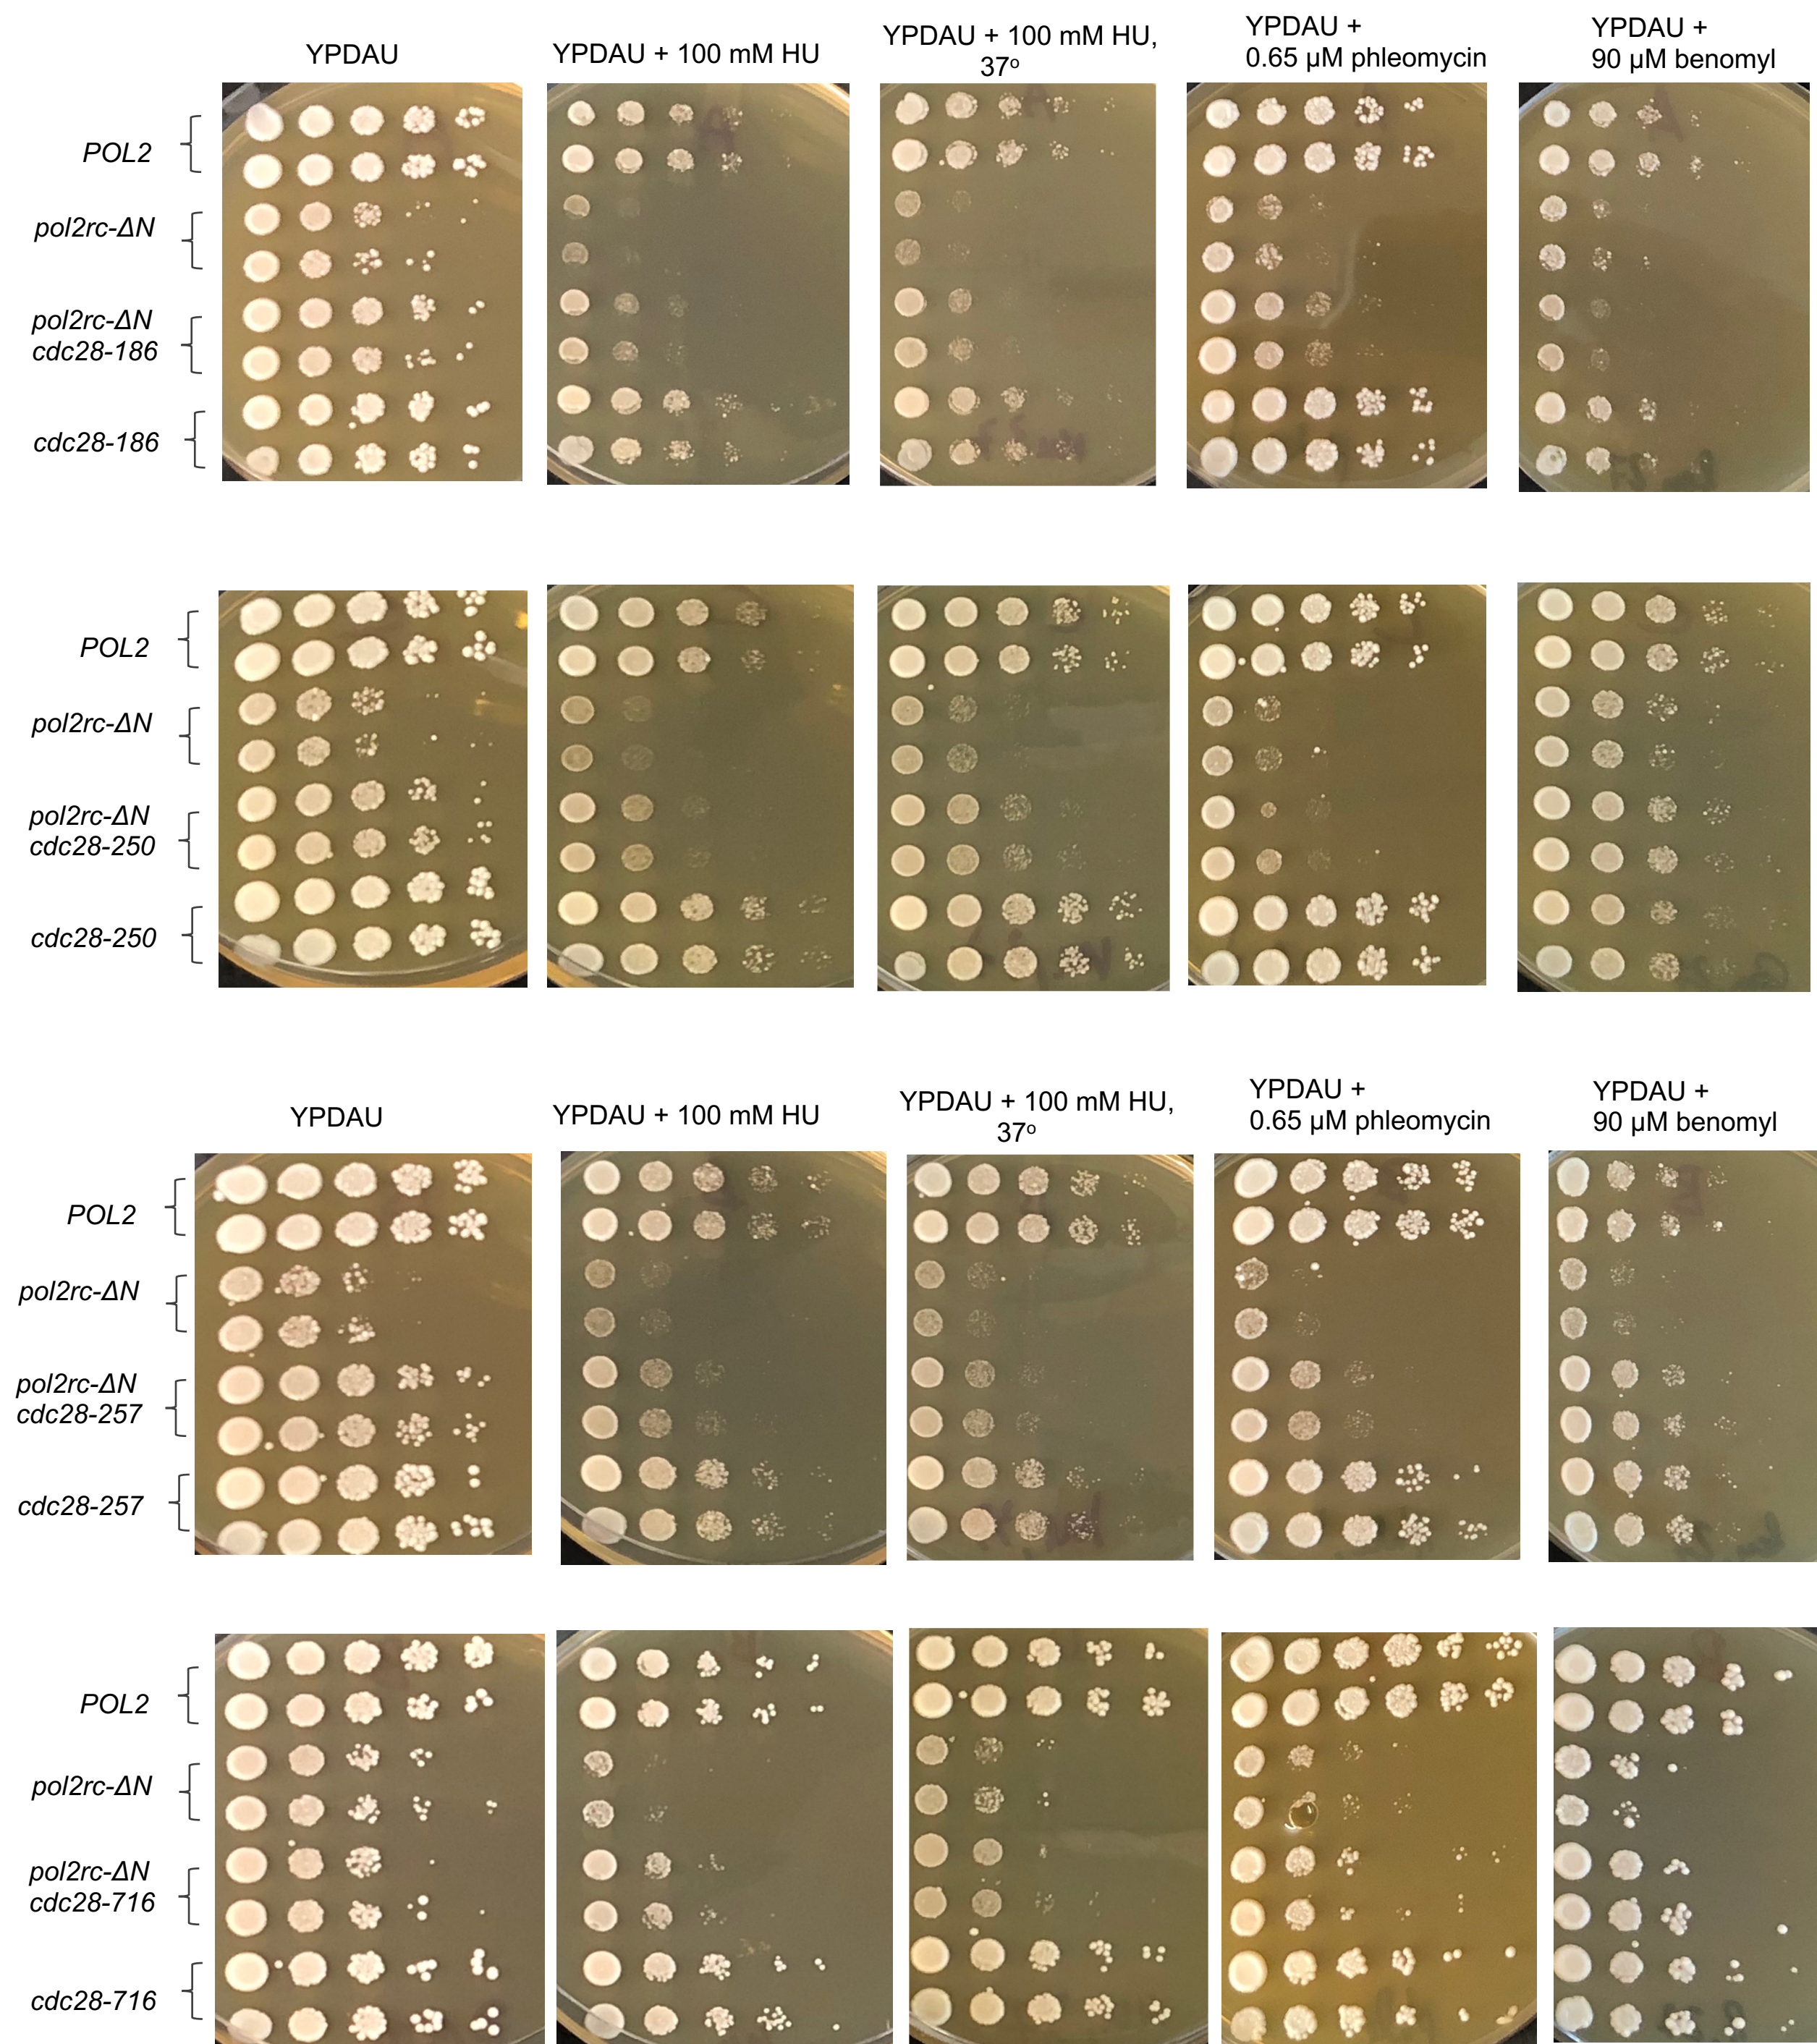

**Supplemental Figure 10. Rescue of growth defects and drug-sensitivity of *pol2rc-ΔN* by *cdc28* mutations.**

Yeast cells were grown in microtiter plates in 200 μL overnight and plated onto YPDAU by a multi-prong device after 10-fold serial dilutions.
