# Supplementary material
Source: publisher figshare collection journal article supplement (https://gsajournals.figshare.com/articles/dataset/_/14357234)
Supplement: Supplementary file 9 [file 1]

**Supplemental Table 2. Differences in mutant frequencies with or without UV-light irradiation in *pol2rc-ΔN* vs. wild-type strains\***

| UV dose                 | Mutant frequency × 10 <sup>-7</sup> , mean ± SEM |                              |                  |                           | Survival %,<br>mean ± SEM |                           |
|-------------------------|--------------------------------------------------|------------------------------|------------------|---------------------------|---------------------------|---------------------------|
|                         | Can <sup>r</sup>                                 |                              | His <sup>+</sup> |                           |                           |                           |
|                         | wt                                               | <i>pol2-ΔN</i>               | wt               | <i>pol2-ΔN</i>            | wt                        | <i>pol2-ΔN</i>            |
| No UV                   | 32.7 ± 10.8                                      | 236.6 ± 33.7<br>p<0.00001    | 0.3 ± 0.08       | 2.3 ± 0.4<br>p<0.00001    | 100                       | 100                       |
| UV, 10 J/m <sup>2</sup> | 283.8 ± 54.7                                     | 453.7 ± 111.8<br>p=0.09029   | 6.0 ± 0.9        | 10.7 ± 1.1<br>p= 0.001684 | 93.7 ± 4.6                | 94.8 ± 5.9<br>p= 0.459157 |
| UV, 20 J/m <sup>2</sup> | 860.9 ± 203.2                                    | 697.7 ± 150.4<br>p= 0.261212 | 16.5 ± 1.4       | 25.2 ± 1.9<br>p=0.000298  | 77.3 ± 2.6                | 73.9 ± 4.9<br>p=0.269633  |
| UV, 40 J/m <sup>2</sup> | 2602.3 ± 684.5                                   | 1393.5 ± 285.3<br>p= 0.05576 | 59.2 ± 2.9       | 72.7 ± 3.9<br>p=0.004302  | 43.5 ± 2.0                | 35.3 ± 2.0<br>p= 0.002848 |

\* The P values for statistically significant differences are underlined (one-tailed t-test).
