# Supplementary material
Source: publisher figshare collection journal article supplement (https://gsajournals.figshare.com/articles/dataset/_/14357234)
Supplement: Supplementary file 10 [file 1]

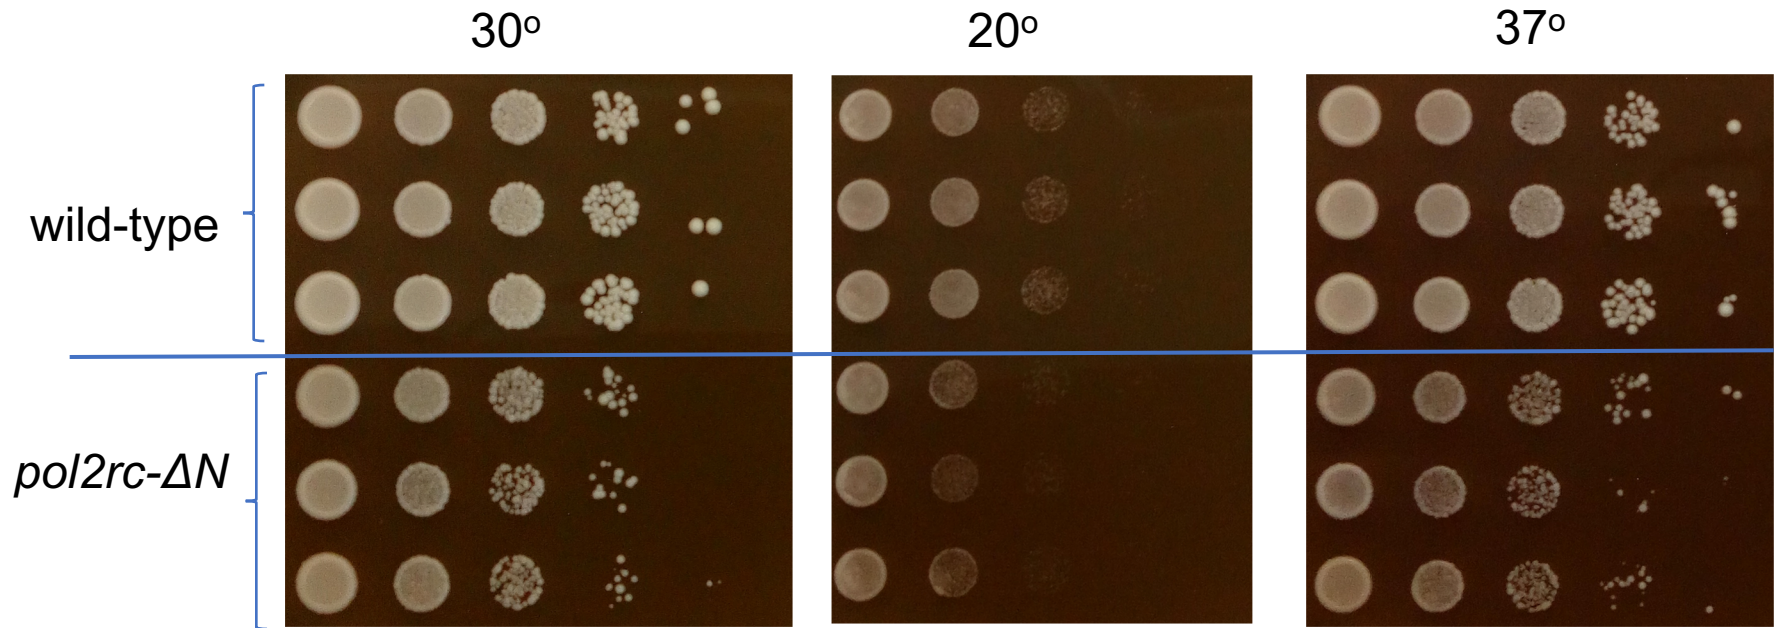

**Supplemental Figure 6. Strains with *pol2rc-ΔN* grow slower than wild-type but are not high temperature-sensitive or cold-sensitive.**

Serial 10-fold dilutions of cell suspension of strains grown in YPRGAU were plated in horizontal rows by a 48-prong device on control, precooled/preheated plates with YPDAU media, and incubated at the indicated temperature for two days.
