# Supplementary material
Source: publisher figshare collection journal article supplement (https://gsajournals.figshare.com/articles/dataset/_/14357234)
Supplement: Supplementary file 12 [file 1]

**A.**

YEE302 [pJA8]

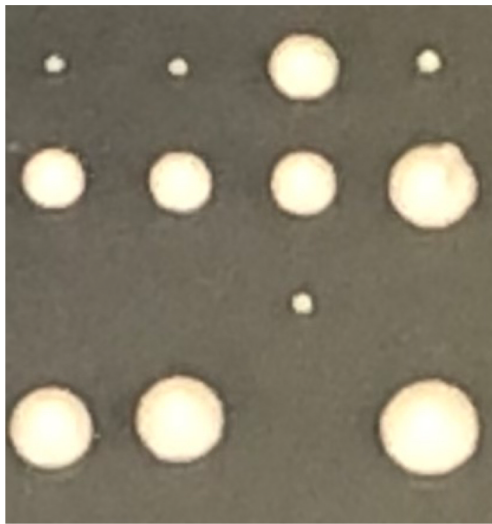

YEE302 [pJA8w/oDPB4]

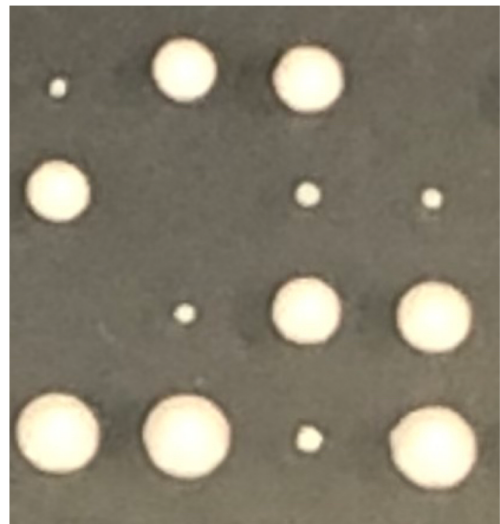

**B. :**

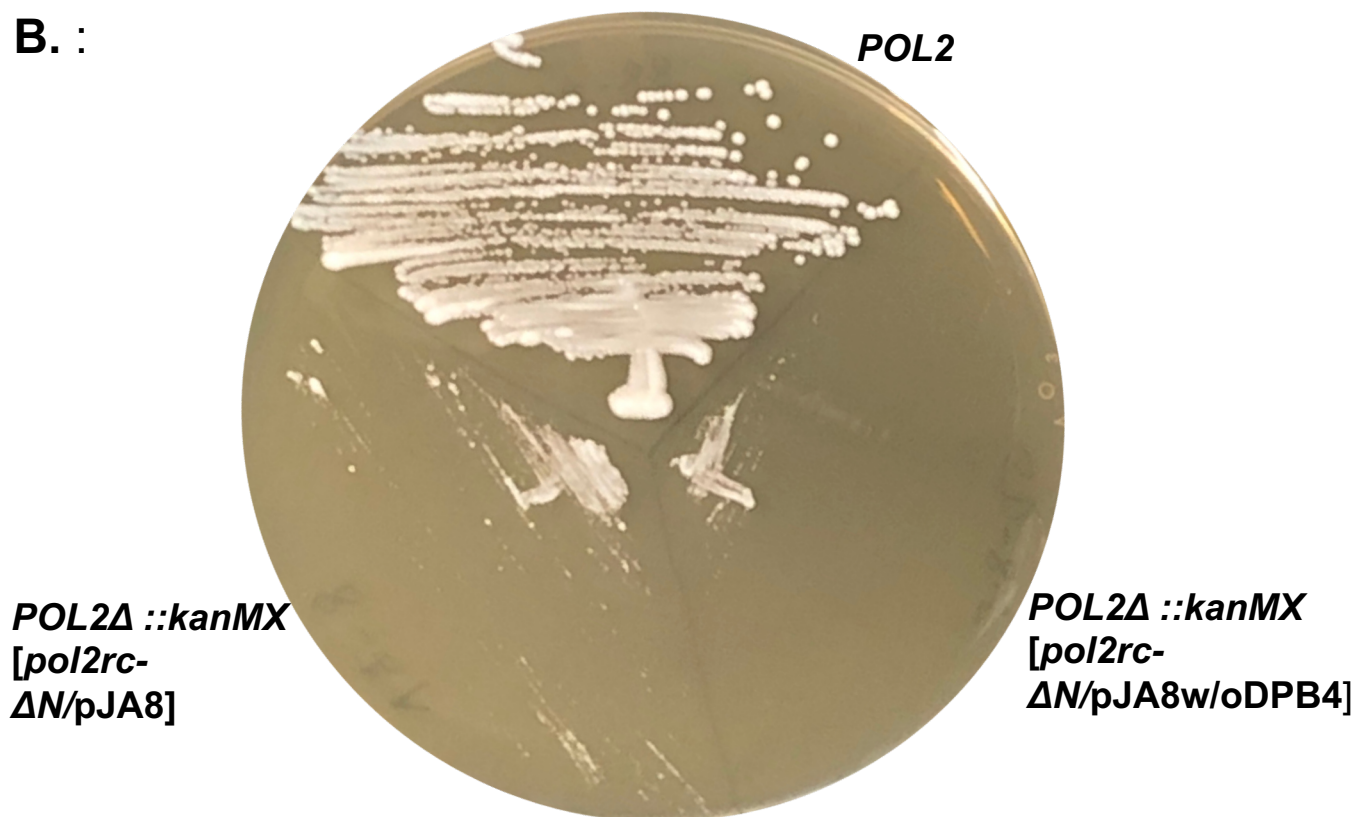

**Supplemental Figure 2. The absence of *DPB4* does not change the slow growth phenotype of *pol2-ΔN* mutants**

A. Growth of spores after micromanipulation of hybrids with pJA8 or pJA8w/rDPB4; the photo was taken on day 4.

B. Sub-cloning of segregants with different alleles of *POL2*. The photo was taken on day 2.
