# Supplementary material
Source: publisher figshare collection journal article supplement (https://gsajournals.figshare.com/articles/dataset/_/14357234)
Supplement: Supplementary file 13 [file 1]

|                                 |                                                              |
|---------------------------------|--------------------------------------------------------------|
| Saccharomyces cerevisiae        | -----msgelanYkrlEKvGEGTYGVVYKAlDlRpGqGqrVVALKKIRLES          |
| Homo sapiens                    | -----MEDYtKIEKIGEGTYGVVYKgRhKtT-----GQVAmKKIRLES             |
| Caenorhabditis elegans          | mdpiregevahegdsYtlnDftKlEKIGEGTYGVVYKgKnRRT----namVAmKKIRLES |
| Schizosaccharomyces octosporus  | -----MdnYvKVEKIGEGTYGVVYKAKhKss----GrIVAmKKIRLED             |
| Candida pseudohaemulonius       | -----MvelsDfgrqEKIGEGTYGVVYKAlDtRh--nnrVVALKKIRLES           |
| Spizellomyces punctatus         | -----MdkYdKIEKvGEGTYGVVYKARDRhS-----GEIVALKKIRLET            |
| Apiotrichum porosum             | -----mSlqnYtKlEKvGEGTYGVVYKAvDlQs---GnfVALKKIRLEa            |
| Cryptococcus amyloletus         | -----mSldnYhKlEKvGEGTYGVVYKAKDinT---GsIVALKKKIRLEa           |
| Kwoniella pini                  | -----mSldnYtKlEKvGEGTYGVVYKARDIsT---GnfVALKKIRLEa            |
| Malassezia pachydermatis        | -----MENYqKIEKvGEGTYGVVYKARDltpGanGrLVALKKIRLEa              |
| Pseudomicrostroma glucosiphilum | -----MENYqKlEKvGEGTYGVVYKARDltaegGGrIVALKKKIRLEa             |
| Nematostella vectensis          | -----MdDfsKIEKIGEGTYGVVYKAKhKtT---GgfaALKKKIRLEv             |
| Trichoplax adhaerens            | -----MdkYlKIEKIGEGTYGVVYKgKnRnT---qQLVALKKIRLEn              |
| Hemicentrotus pulcherrimus      | -----MEDftKIEKlGEGTYGVVYKgRhKRT---GkIVALKKKIRLES             |
| Halocynthia roretzi             | -----MEDYiKIEKIGEGTYGVVYKgRhKtT---nQyVALKKIRLES              |
| Oryzias luzonensis              | -----MEDYvKIEKIGEGTYGVVYKgRhKsT---GQVAmKKIRLES               |
| Rana dybowskii                  | -----MdeYaKIEKIGEGTYGVVYKgRhKaT---GQIVAmKKIRLEn              |
| Gallus gallus                   | -----MEDYtKIEKIGEGTYGVVYKgRhKtT---GQVAmKKIRLES               |
| Drosophila melanogaster         | -----MEDFeKIEKIGEGTYGVVYKgRhKlT---GQIVAmKKIRLES              |
| Ixodes scapularis               | -----MEDYtKVEKIGEGTYGVVYKgKnKs---GQIVAmKKIRLES               |

|                                 |                                                              |                                    |      |
|---------------------------------|--------------------------------------------------------------|------------------------------------|------|
|                                 | *L62                                                         | L84*                               | *L86 |
| Saccharomyces cerevisiae        | EDEGVPSTAIREISLLKEL-Kdd----                                  | NIVrLyDIvHsdaHKLYLVFEFLDlDLKRYMeg  |      |
| Homo sapiens                    | EeEGVPSTAIREISLLKEL-RHF----                                  | NIVsLqDvLmQds-rLYLiFEFLsMDLKKYlDS  |      |
| Caenorhabditis elegans          | EDEGVPSTAIREISLLKEL-qHP----                                  | NvVgLeavimQEn-rLfLiFEFLsfDLKRYMDq  |      |
| Schizosaccharomyces octosporus  | EsEGVPSTAIREISLLKEv-ndesnrsNcVrLlDILHaES-KLYLVFEFLDMDLKKYMDr |                                    |      |
| Candida pseudohaemulonius       | EDEGVPSTAIREISLLKELm-Rdd----                                 | NIVrLyDIiHsdSHKLYLVFEFLDlDLKKYMeI  |      |
| Spizellomyces punctatus         | EDEGVPSTAIREISLLKEL-KHP----                                  | NIVrLlDIvHnda-KLYLiFEFLDlDLKKYMDT  |      |
| Apiotrichum porosum             | EDEGVPSTsIREISLLKELSKdd----                                  | NIVkLlDIvHQda-KLYLVFEFLDlDLKRYMDS  |      |
| Cryptococcus amyloletus         | EDEGVPSTsIREISLLKELSKdd----                                  | NIVkLlDIvHsEa-KLYLVFEFLDMDLKKYMDS  |      |
| Kwoniella pini                  | EDEGVPSTsIREISLLKELSKdd----                                  | NIVkLlDIvHsda-KLYLVmEFLDMDLKKYMDN  |      |
| Malassezia pachydermatis        | EDEGVPSTAIREISLLKEL-Rde----                                  | NIVrLyeIiHQES-rLYLVFEFLDlDLKKYMDN  |      |
| Pseudomicrostroma glucosiphilum | EDEGVPSTAIREISLLKEL-Knd----                                  | NIVrLyDIiHQES-KLYLVFEFLDlDLKKYMDN  |      |
| Nematostella vectensis          | EDEGiPSTAIREISLLKELrhHP----                                  | NvVeLqhILHQEp-KLYLVFEYlTcDLKKhldT  |      |
| Trichoplax adhaerens            | EeEGVPSTAIREISLLKEL-KHP----                                  | NIVdLievLYEES-KLYLVFEFLDMDLKKRYlDT |      |
| Hemicentrotus pulcherrimus      | EeEGVPSTAIREISLLKEL-yHP----                                  | NIVlLeDvLmEpn-rLYLVFEYlTMDLKKYMeS  |      |
| Halocynthia roretzi             | EeEGVPSTAIREISiLkEL-qHP----                                  | NIVsLlDvLlQES-KLYLVFEFLqMDLKKYMDS  |      |
| Oryzias luzonensis              | EeEGVPSTAIREISLLKEL-KHP----                                  | NvVrLlDvLmQES-rLYLiFEFLsMDLKKYlDS  |      |
| Rana dybowskii                  | EeEGVPSTAIREISLLKEL-qHP----                                  | NIVcLlDvLmQds-rLYLiFEFLsMDLKKYlDS  |      |
| Gallus gallus                   | EeEGVPSTAIREISLLKEL-hHP----                                  | NIVcLqDvLmQda-rLYLiFEFLsMDLKKYlDT  |      |
| Drosophila melanogaster         | dEGVPSTAIREISLLKEL-KHe----                                   | NIVcLeDvLmEEn-riYLiFEFLsMDLKKYMDS  |      |
| Ixodes scapularis               | EdDGVPSTAIREITLLKEL-nHR----                                  | NIVrLqDvimQEn-KvYLVFEFLsMDLKKhldT  |      |

|                                 |                                                               |
|---------------------------------|---------------------------------------------------------------|
| Saccharomyces cerevisiae        | IPk-d-QpLgadIVKkfMmQlCkGIayCHShRiLHRDLKPQNLLInKdGnlKLgDFGLAR  |
| Homo sapiens                    | IPp-G-QymDssLVKSYLYQILQGivFCHSRRVLHRDLKPQNLLIDdKgtIKLADFGLAR  |
| Caenorhabditis elegans          | Lgk-d-EyLpletlKSYtFQILQamcFCHqRRViHRDLKPQNLLvDnnGaIKLADFGLAR  |
| Schizosaccharomyces octosporus  | IsetGAsaLDPrlVqkfaYQlvnGvnFCHSRRiHRDLKPQNLLIDKEGnlKLADFGLAR   |
| Candida pseudohaemulonius       | IPq-G-agLEPsmVKrfMhQlIKGIkhCHShRVLHRDLKPQNLLIDKdGnlKLADFGLAR  |
| Spizellomyces punctatus         | qsn----gLsapLiKSYMYQILKGIhYCHchRiLHRDLKPQNLLIDqQGmlKLADFGLAR  |
| Apiotrichum porosum             | LPd-k-BaLpPnLVKkftYQlIKGlfyCHvhRVLHRDLKPQNLLIDKEGnlKLADFGLAR  |
| Cryptococcus amyloletus         | Lge-k-dgLgPmMVKkfsYQlIKGIYFCHghRiLHRDLKPQNLLInKgGdlKiADFGLAR  |
| Kwoniella pini                  | Igd-k-dgLgPnMVKkftYQlvKGlyyCHAhRiLHRDLKPQNLLInKEGnlKiADFGLAR  |
| Malassezia pachydermatis        | Vad-kpEgLGPeIVmkftYQlvRGIYFCHAhRiLHRDLKPQNLLIDKEGnlKLADFGLAR  |
| Pseudomicrostroma glucosiphilum | Vag-tAdgLgPeIVKkftYQlLRGIYyCHAhRiLHRDLKPQNLLIDKtGnlKLADFGLAR  |
| Nematostella vectensis          | trg----mLDktLVKSYLYQITnaIyFCHARRiLHRDLKPQNLLIDSKGlIKLADFGlGr  |
| Trichoplax adhaerens            | LPk-G-ktiDamLmKSYLYQIILGvvyCHShRVLHRDLKPQNLLInSKGcIKLADFGlGr  |
| Hemicentrotus pulcherrimus      | L-k-G-kqmdPaLVKSYLYhQmvdGIlFCHSRRiLHRDLKPQNLLIDnnGtIKLADFGLAR |
| Halocynthia roretzi             | IPa-G-kymDkeLVKSYtYQILQGItFCHSRRVLHRDLKPQNLLIDnGtiKLADFGLAR   |
| Oryzias luzonensis              | IPs-G-QymDEmLVKSYLYQILEGIYFCHrRRVLHRDLKPQNLLIDnKvIKLADFGLAR   |
| Rana dybowskii                  | IPs-G-QyLEamLVKSYLYQILQGIiFCHARRVLHRDLKPQNLLIDSKGvIKLADFGLAR  |
| Gallus gallus                   | IPs-G-QyLDrSrVKSYLYQILQGIvFCHSRRVLHRDLKPQNLLIDdKGVIKLADFGLAR  |
| Drosophila melanogaster         | LPv-d-khmEseLvrSYLYQITsaIlFCHrRRVLHRDLKPQNLLIDKSGLIKvADFGlGr  |
| Ixodes scapularis               | LPk-n-QsmDtkLVKSYLYQILEGIIFCHrRRVLHRDLKPQNLLIDdKGlIKLADFGLAR  |

|                                 |                                                               |
|---------------------------------|---------------------------------------------------------------|
| Saccharomyces cerevisiae        | AFGvPLRaYTHEiVTLLWYRAPEVLLGgkqYSTgVDtWSIGCIFAEMcnrKPiFsGDSEID |
| Homo sapiens                    | AFGIPIrVYTHEVVTLLWYRsPEVLLGSaRYSTPVDiWSIGtIFAELATKKPLFHGDSEID |
| Caenorhabditis elegans          | AiGIPIrVYTHEVVTLLWYRAPEiLmGagRYSMgVDMWSIGCIFAEMATKKPLFqGDSEID |
| Schizosaccharomyces octosporus  | sFGvPLRnYTHEiVTLLWYRAPEVLLGSrhYSTgVDiWSVGCIFAEMirrtPLFpGDSEID |
| Candida pseudohaemulonius       | AFGvPLRaYTHEVVTLLWYRAPEiLLGgkqYSTgVDMWSVGCIFAEMcnrKPLFpGDSEID |
| Spizellomyces punctatus         | AFGvPLRtYTHEVVTLLWYRAPEiLLGSkhYSTaVDMWSVGCIFAEMclrhPLFpGDSEID |
| Apiotrichum porosum             | AFGIPLRtYTHEVVTLLWYRAPEVLLGSrhYSTaIdMWSVGCIFAEMamrsPLFpGDSEID |
| Cryptococcus amyloletus         | AFGIPLRtYTHEVVTLLWYRAPEVLLGSrhYSTaIdMWSVGCiVAEAMtrqPLFpGDSEID |
| Kwoniella pini                  | AFGIPLRtYTHEVVTLLWYRAPEVLLGSrhYSTaIdMWSVGCiYAEAMmrqPLFpGDSEID |
| Malassezia pachydermatis        | AFGIPLRtYTHEVVTLLWYRAPEVLLGSrhYnTaIdMWSVGCIFAEMamrtPLFpGDSEID |
| Pseudomicrostroma glucosiphilum | AFGIPLRtYTHEVVTLLWYRAPEVLLGSrhYSTaIdMWSVGCIFAEMAmKsPLFpGDSEID |
| Nematostella vectensis          | AFGIPLRaYTHEVVTLLWYRAPEVLLGgqRYScPiDvWSIGtIFAEMvTKRPLFHGDSEID |
| Trichoplax adhaerens            | AFGvPvRVYTHEVVTLLWYRAPEVLLGStRYSCLDiWStGtIFAEMwlrRPLFqGDSEID  |
| Hemicentrotus pulcherrimus      | AFGIPLRtYTHEVVTLLWYRAPEVLLGStRYacPiDMWSLGCIFAEMvTKRPLFHGDSEID |
| Halocynthia roretzi             | AFGIPLRVYTHEVVTLLWYRAPEVLLGStRYSCLDiWStGtIFAEMATKKPLFHGDSEID  |
| Oryzias luzonensis              | AFGvPvRVYTHEVVTLLWYRAPEVLLGSPrYSTPVDvWStGtIFAELATKKPLFHGDSEID |
| Rana dybowskii                  | AFGIPLRVYTHEVVTLLWYRAPEVLLGSvRYSTPVDvWSIGtIFAELASKKPLFHGDSEID |
| Gallus gallus                   | AFGIPLRVYTHEVVTLLWYRAPEVLLGSaLYSTPVDiWSIGtIFAELATKKPLFHGDSEID |
| Drosophila melanogaster         | sFGIPvRIYTHEiVTLLWYRAPEVLLGSPrYScPVDiWSIGCIFAEMATrKPLFqGDSEID |
| Ixodes scapularis               | AFGIPIrVYTHEiVTLLWYRAPEVLLGSPrYSTPiDiWSIaCiFvEMinKRPLFHGDSEID |

|                                 |                                                              |
|---------------------------------|--------------------------------------------------------------|
|                                 | *I239                                                        |
| Saccharomyces cerevisiae        | qiFkIFRvLGTpNEaIWfdivyLPdfKpsFFqWRrkdLsqvVps-----LDprGIDLl   |
| Homo sapiens                    | qLFRIFRaLGTpNNEVWPeVeSLqDYKNTFFPKWKpgsLashVKN-----LDENGLDlL  |
| Caenorhabditis elegans          | ELFRIFRvLGTpTEleWnGveSLPDYKaTFPKWrenfLrdkfydkktgkhlLDDtafsLL |
| Schizosaccharomyces octosporus  | EiFkIFqzLGTpNEEVWPGVTiLlqDYKSTFFPKWRvdlhrvTpn-----geEaaTeLL  |
| Candida pseudohaemulonius       | EiFRIFRiLGTpNEEVWPDvTyLPdfKtTwPKWersdLgphIps-----LDrdGvDlL   |
| Spizellomyces punctatus         | EiFRIFRTLGTpNEEiWPNvTtLPDYKenFPiWtaqnLakvlpN-----LeseGvDlL   |
| Apiotrichum porosum             | EiFRIFRiLGTpDEESWPGirSLPDYKSsFPqWhqaeLggaVsg-----LDaNGlDlL   |
| Cryptococcus amyloletus         | EiFRIFRvLGTpDEdVWPGVrSLPDYKpTFPqWspinLgdvVKg-----LDadGMDlV   |
| Kwoniella pini                  | EiFRIFRvLGTpDEdVWPGVraLPDYKpTFPqWnaveLksaVKg-----LDENGsDlL   |
| Malassezia pachydermatis        | EiFRIFRTLGTpNdeVWPGVqSLPDYKtTFPKWngvpLksaVsg-----LDDtGLDlL   |
| Pseudomicrostroma glucosiphilum | EiFRIFRTLGTpTdaVWPGVktLPDYKasFPqWsgmpLakaVpN-----LDaNGIDlL   |
| Nematostella vectensis          | qLFRIFRiLGTpTEEtWkGVtSLPDYKpTFPKWagdgLkkaVpq-----LDsdGLDlL   |
| Trichoplax adhaerens            | ELFRIFRiLGTpdddIWPGVSSLPefKKSsFPKWSkqsydtfVpN-----msEsGIDlL  |
| Hemicentrotus pulcherrimus      | qLFRIFRtLGTpTdeIWPGVTqLqDYKSTFFPmWtkpnikgaVKg-----mDeeGLDlL  |
| Halocynthia roretzi             | qLFRIFRvLGTatEddWPGVTSLkDYKrTFPKWKkgmvvesVKN-----LnEeGIDlL   |
| Oryzias luzonensis              | qLFRIFRtLGTpNndVWPDVeSLPDYKNTFFPKWKggsLssmVKN-----LDKNGlDlL  |
| Rana dybowskii                  | qLFRIIselwGTPNnEVWPeVeSLqDYKNTFFPKWKggsLaanVKN-----iDKeGLDlL |
| Gallus gallus                   | qLFRIFRaLGTpNndVWPDVeSLqDYKNTFFPKWKpgsLgthVqN-----LDeDGLDlL  |
| Drosophila melanogaster         | qLFRmFRiLkTpTEdIWPGVTSLPDYKNTFFCWstnqLtnqLKN-----LDaNGIDLi   |
| Ixodes scapularis               | qLFRIFRtLGTpTEdtWPGVTkLPDYKSsFPnWseniLrsllKN-----mDDdGIDlL   |

|                                 |                                                |
|---------------------------------|------------------------------------------------|
| Saccharomyces cerevisiae        | dKlLaYDPinRISArRAaiHPYFqEs-----                |
| Homo sapiens                    | SKMLIYDPAkRISgKmaLnHPYFNdlDnqikm-----          |
| Caenorhabditis elegans          | egLliYDPSlRlnAKKALvHPYFDnmDtS---kLPagnyrGeIelf |
| Schizosaccharomyces octosporus  | saMLVYDPAhRISAKRALqgPYlrEygeTfv-----           |
| Candida pseudohaemulonius       | eqMLnYDPSnRISAKRALvHPYFqEdNdeaydsyPrsvnmG----  |
| Spizellomyces punctatus         | SRLLVYDPAqRISAKRALsHPYFadvDtSkSl-----          |
| Apiotrichum porosum             | AqtLIYDPAqRISAKRALqHPYFatsvaAaangta-----       |
| Cryptococcus amyloletus         | AqtLVfDPAhRISAKRALrHPYFDtvNlAaa-----           |
| Kwoniella pini                  | AqtLIIfDPAhRISAKRALqHPYFtstypA-----            |
| Malassezia pachydermatis        | hhMLIYDPAiRISAKRALqHPYFasvsaa-----             |
| Pseudomicrostroma glucosiphilum | kgMLVYDPAgRvSAKRgLnHaYFqslpgSamas-----         |
| Nematostella vectensis          | kKMLIYDPAIRISAKTsLkHPYFlnDpkfdinsLPktpevdsVm-- |
| Trichoplax adhaerens            | SKMLIYDPAAnRISgKRALsHPYFDDlDkS---tLPtdrws----- |
| Hemicentrotus pulcherrimus      | eKMLIYDPAkRItAKasmrHPYFDnipdlsdrlqPirs-----    |
| Halocynthia roretzi             | qKcLVYDPAkRISAKALmHPYFNnlDkklclvLtsalfhe-----  |
| Oryzias luzonensis              | AKMLIYnFpkRISAreAmtHPYFDDlDkS---tLPaacingv---- |
| Rana dybowskii                  | AKMLVYDPAkRISArKALLHPYFDDlDkS---sLPanqirn----- |
| Gallus gallus                   | SKMLIYDPAkRISgKmaLnHPYFDDlDkS---tLPanlikkf---- |
| Drosophila melanogaster         | qKMLIYDFvhRISAKdiLeHPYFNqfgsglvrn-----         |
| Ixodes scapularis               | ekMLVYDFvrrISAKdcLdHPYlND-----                 |

**Supplementary Figure 11. Multiple alignment of CMGC/CDK/CDC2 protein kinase orthologs.** Blue capital letters stand for highly conserved positions, as suggested by the EBI web server (<https://www.ebi.ac.uk/Tools/msa/muscle/>). Asterisks show positions of amino acid changed in *cdc28* mutants found in our work (labeled either on the right of left to the asterisk). Protein identifiers: NP\_001307847.1 (*Homo sapiens*), NP\_009718.3 (*Saccharomyces cerevisiae*),

XP\_016605543.1 (*Spizellomyces punctatus*), XP\_017992564.1 (*Malassezia pachydermatis*), XP\_028477809.1 (*Apiotrichum porosum*), XP\_025347166.1 (*Pseudomicrostroma glucosiphilum*), XP\_019012246.1 (*Kwoniella pini*), XP\_018995495.1 (*Cryptococcus amylo lentus*), XP\_024712237.1 (*Candida pseudohaemulon is*), XP\_013017915.1 (*Schizosaccharomyces octosporus*), P13863 (*Gallus gallus*), P34556 (*Caenorhabditis elegans*), P23572 (*Drosophila melanogaster*), BAC98412.1 (*Halocynthia roretzi*), Q9DG98 (*Oryzias luzonensis*), Q9W739 (*Rana dybowskii*), BAA23218.1 (*Hemicentrotus pulcherrimus*), XP\_001635734.1 (*Nematostella vectensis*), XP\_002111844.1 (*Trichoplax adhaerens*), XP\_002415172.1 (*Ixodes scapularis*).
