# Supplementary material
Source: publisher figshare collection journal article supplement (https://gsajournals.figshare.com/articles/dataset/_/14357234)
Supplement: Supplementary file 14 [file 1]

*POL2*

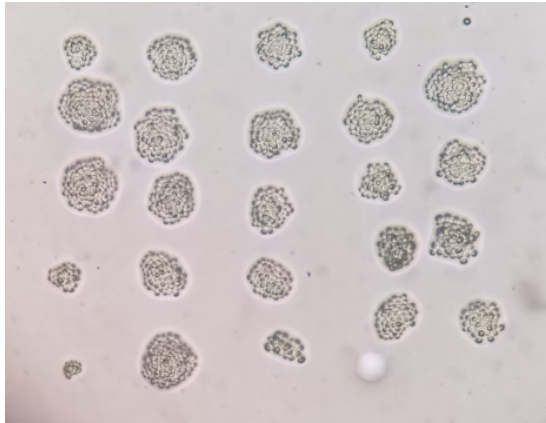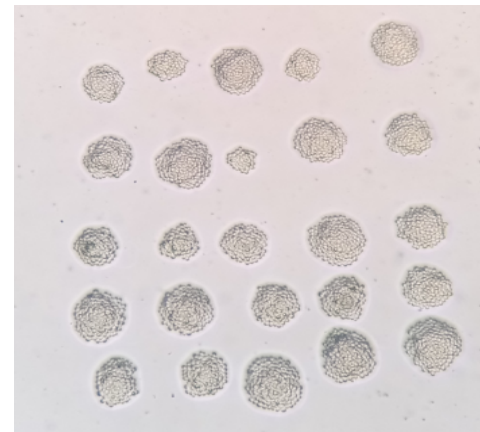

*pol2rc-ΔN*

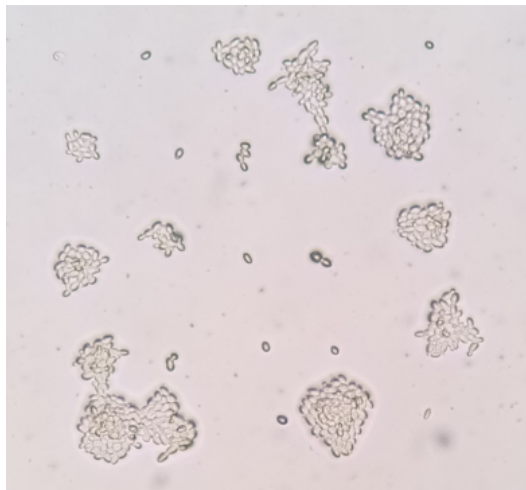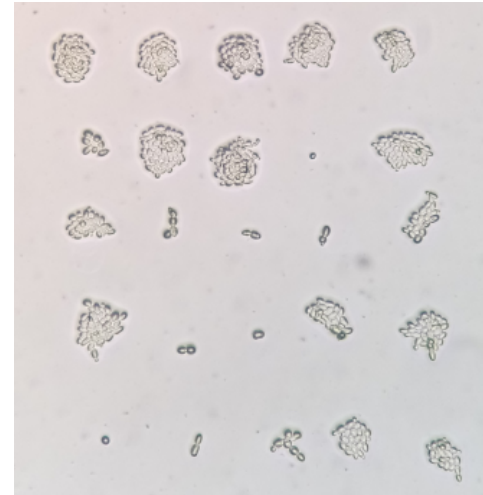

**Supplemental Figure 8. Many cells with *pol2rc-ΔN* have difficulty to start dividing.**

Photographs of microcolonies grown on YPRGAU plates in 24 hours at room temperature (20°) from single bud-less cells put by micromanipulator in a grid.
