# Supplementary material
Source: publisher figshare collection journal article supplement (https://gsajournals.figshare.com/articles/dataset/_/14357234)
Supplement: Supplementary file 15 [file 1]

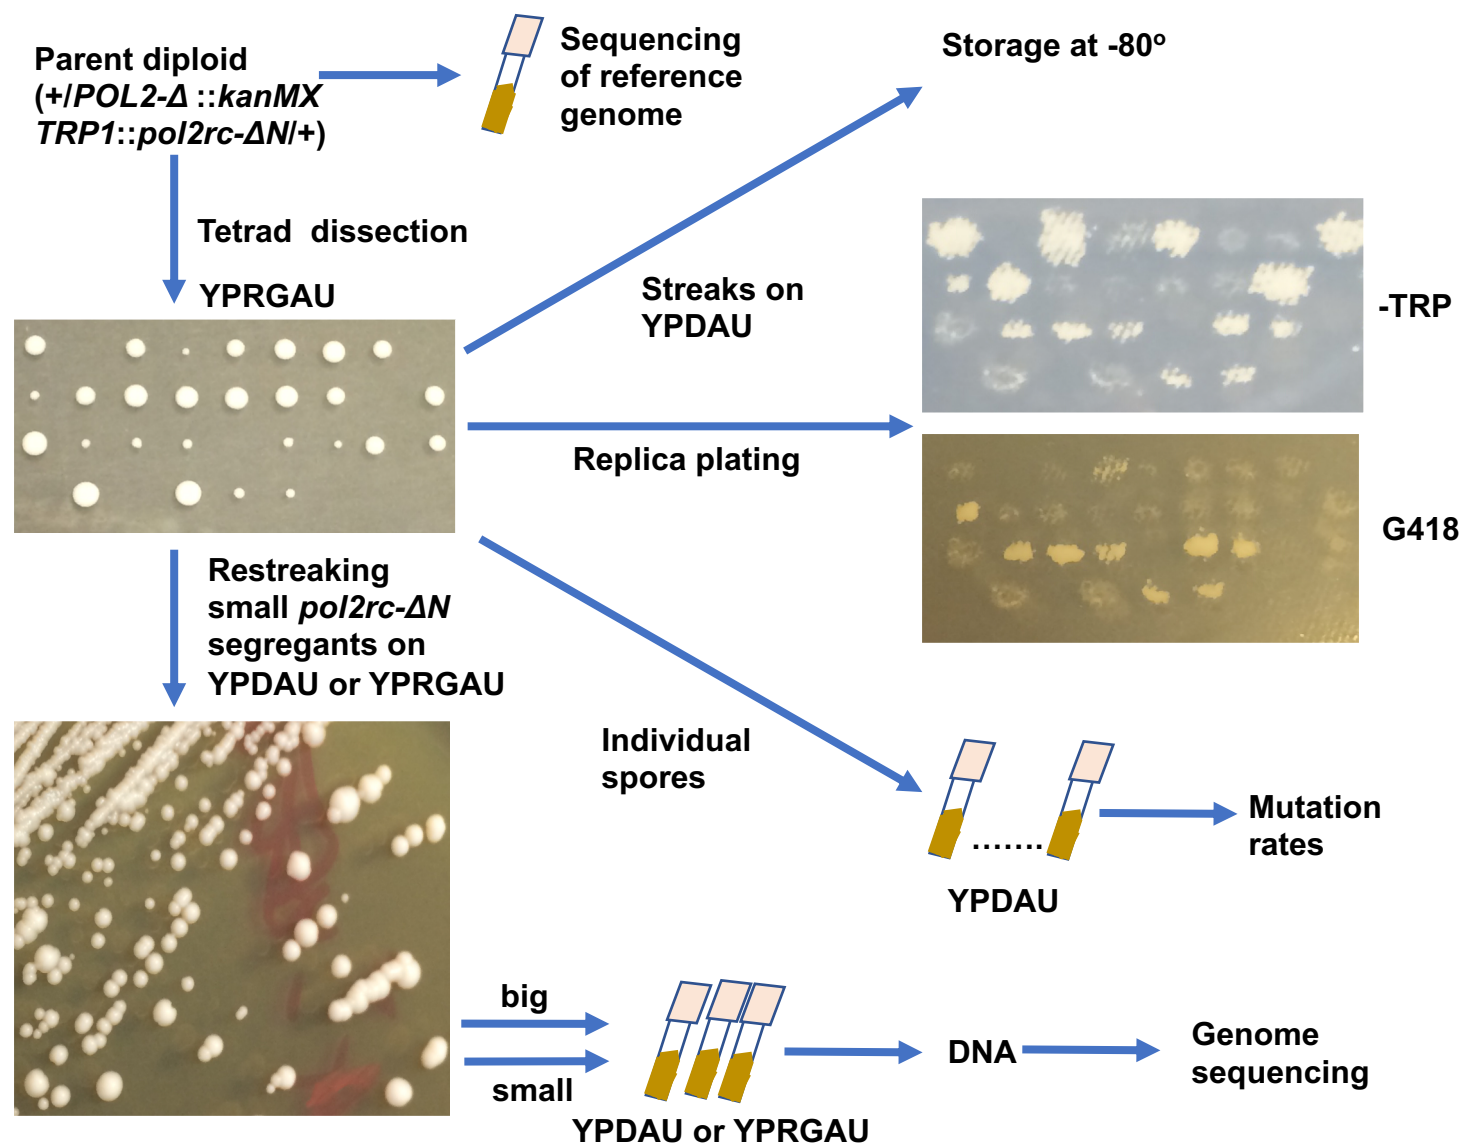

**Supplemental Figure 3. Outline of genetic analysis of diploids double heterozygous for the complete deletion of *POL2* gene and *pol2rc-ΔN*.**

Plates with tetrads (upper left) were directly replica-plated to diagnostic media, and genotyped segregants were used for mutation rate analysis. Segregants with the combination of the *POL2* deletion and *pol2rc-ΔN* are G418 resistant and Trp<sup>+</sup> (upper right). Re-streaking of these small colonies gives a plethora of colonies of varying sizes (lower left). These colonies were used for genomic sequencing.
