# Supplementary material
Source: publisher figshare collection journal article supplement (https://gsajournals.figshare.com/articles/dataset/_/14357234)
Supplement: Supplementary file 16 [file 1]

**Supplemental Table 6. Types of mutations found in genomes of *pol2rc-ΔN* strains.**

| Type of substitution | Number of mutations found in all genomes |      | Number of independent mutations (taking into account common origin of sequenced genomes) |      |
|----------------------|------------------------------------------|------|------------------------------------------------------------------------------------------|------|
|                      | Number of mutations                      | %    | Number of independent mutations                                                          | %    |
| GC->CG               | 116                                      | 39.7 | 89                                                                                       | 45.2 |
| AT->TA               | 50                                       | 17.1 | 39                                                                                       | 19.8 |
| AT->CG               | 12                                       | 4.1  | 12                                                                                       | 6.1  |
| AT->GC               | 35                                       | 12.0 | 25                                                                                       | 12.7 |
| GC->AT               | 28                                       | 9.6  | 15                                                                                       | 7.6  |
| GC->TA               | 49                                       | 16.8 | 16                                                                                       | 8.1  |
| Complex (AAA->TAT)   | 2                                        | 0.7  | 1                                                                                        | 0.5  |
| Total                | 292                                      | 100  | 197                                                                                      | 100  |
