# Supplementary material
Source: publisher figshare collection journal article supplement (https://gsajournals.figshare.com/articles/dataset/_/14357234)
Supplement: Supplementary file 17 [file 1]

*Problems with construction of haploid yeast with DNA polymerase alleles reducing fitness.*

In previous classic studies, *pol* mutants were created either by a plasmid shuffling method (ARAKI *et al.* 1992) or by integration-excision into the genome of a vector carrying the allele of interest (MORRISON *et al.* 1991). The low stability of replicative plasmids is the first method's limitation, but it is popular because of simplicity (ARAKI *et al.* 1992; KESTI *et al.* 1999; DEVBHANDARI AND REMUS 2020). Integration is the most popular method (JIN *et al.* 2001; SIEBLER *et al.* 2014; BARBARI *et al.* 2018), but it is not well-suited for examining the phenotypes of lethal mutations or mutations severely reducing fitness. In this method, the mutant copy of a truncated or full-length *pol* allele of interest is integrated into the genome at its original location by transformation by a linearized plasmid. The procedure creates a duplication of the original and plasmid-borne alleles with a selective marker between them. It is essential to use a marker that can be counter-selected, like *URA3*. The single-copy mutant allele is obtained by selecting pop-out with the excision of one gene copy and the *URA3* marker on FOA medium, selective for *ura3* mutants. The integration-excision method works well for haploids and mutator *pol* alleles (MORRISON *et al.* 1991; MORRISON AND SUGINO 1992; BARBARI *et al.* 2018). If the mutation leads to lethality or weak growth, the pop-outs will possess almost always only a wild-type allele reconstituted by recombination. Problematic *pol* alleles could be created in diploids in a heterozygous state, but duplication of a polymerase gene and *URA3* will still be present inside the repeat (PAVLOV *et al.* 2001). Selection for pop-outs

in such diploids is difficult (though successes are reported (GARBACZ *et al.* 2018; TER BEEK *et al.* 2019)) because the rate of mitotic recombination between the gene and centromere is typically much higher than the rate of intra-chromosomal recombination and thus, most Ura<sup>-</sup> clones will have a wild-type pol allele. If heterozygous diploids with *polX-URA3-POLX* sporulate, haploid segregants will possess mutant and wild-type alleles, and selection on FOA will again tend to give only clones bearing the wild-type allele. Because of these complications with the integration-excision approach, alternative methods are desirable.

#### **Literature cited.**

- Araki, H., P. A. Ropp, A. L. Johnson, L. H. Johnston, A. Morrison *et al.*, 1992  
DNA polymerase II, the probable homolog of mammalian DNA  
polymerase epsilon, replicates chromosomal DNA in the yeast  
*Saccharomyces cerevisiae*. EMBO J 11: 733-740.
- Barbari, S. R., D. P. Kane, E. A. Moore and P. V. Shcherbakova, 2018 Functional  
analysis of cancer-associated DNA polymerase  $\epsilon$  variants in  
*Saccharomyces cerevisiae*. G3 (Bethesda) 8: 1019-1029.
- Devbhandari, S., and D. Remus, 2020 Rad53 limits CMG helicase uncoupling  
from DNA synthesis at replication forks. Nat Struct Mol Biol 27: 461-471.
- Garbacz, M. A., S. A. Lujan, A. B. Burkholder, P. B. Cox, Q. Wu *et al.*, 2018  
Evidence that DNA polymerase delta contributes to initiating leading  
strand DNA replication in *Saccharomyces cerevisiae*. Nat Commun 9: 88.
- Jin, Y. H., R. Obert, P. M. Burgers, T. A. Kunkel, M. A. Resnick *et al.*, 2001 The  
3'-->5' exonuclease of DNA polymerase  $\delta$  can substitute for the 5' flap

- endonuclease Rad27/Fen1 in processing Okazaki fragments and preventing genome instability. *Proc. Natl. Acad. Sci. U. S. A.* 98: 5122-5127.
- Kesti, T., K. Flick, S. Keranen, J. E. Syvaoja and C. Wittenberg, 1999 DNA polymerase  $\epsilon$  catalytic domains are dispensable for DNA replication, DNA repair, and cell viability. *Mol. Cell* 3: 679-685.
- Morrison, A., J. B. Bell, T. A. Kunkel and A. Sugino, 1991 Eukaryotic DNA polymerase amino acid sequence required for 3'—> 5' exonuclease activity. *Proc. Natl. Acad. Sci. U. S. A.* 88: 9473-9477.
- Morrison, A., and A. Sugino, 1992 Roles of *POL3*, *POL2* and *PMS1* genes in maintaining accurate DNA replication. *Chromosoma*. 102: S147-149.
- Pavlov, Y. I., P. V. Shcherbakova and T. A. Kunkel, 2001 *In vivo* consequences of putative active site missense mutations in yeast replicative DNA polymerases  $\alpha$ ,  $\epsilon$ ,  $\delta$  and  $\zeta$ . *Genetics* 159: 47-64.
- Siebler, H. M., A. G. Lada, A. G. Baranovskiy, T. H. Tahirov and Y. I. Pavlov, 2014 A novel variant of DNA polymerase zeta, Rev3- $\Delta$ C, highlights differential regulation of Pol32 as a subunit of polymerase delta versus zeta in *Saccharomyces cerevisiae*. *DNA Repair* 9: 138-149.
- Ter Beek, J., V. Parkash, G. O. Bylund, P. Osterman, A. E. Sauer-Eriksson *et al.*, 2019 Structural evidence for an essential Fe-S cluster in the catalytic core domain of DNA polymerase  $\epsilon$ . *Nucleic Acids Res* 47: 5712-5722.
